# Supplementary material
Source: PubMed Central journal article supplement (PMC3070184)
Supplement: NIHMS280789-supplement-01.pdf [file NIHMS280789-supplement-01.pdf]

**Supplemental Digital Content.** Table showing the susceptibility of recombinant viruses to HGS004.doc**SUPPLEMENTARY TABLE 1.** Susceptibility of recombinant viruses to HGS004

| V3 loop sequences of recombinant viruses | HGS004            |      |
|------------------------------------------|-------------------|------|
|                                          | IC50 (95% CI)     | FC   |
| 07J-W0 backbone                          |                   |      |
| CTRPGNNTRKSTRIGPGQTFATGDIIGDIRQAHC*      | 1.06 (0.78, 1.45) | 1.00 |
| S306P                                    | 0.08 (0.06, 0.1)  | 0.08 |
| F318I                                    | 0.13 (0.11, 0.15) | 0.12 |
| G321E                                    | 0.24 (0.2, 0.28)  | 0.23 |
| T307I/T320R                              | 1.40 (1.0, 1.98)  | 1.32 |
| T307I/F318I/T320R/G321E                  | 0.09 (0.07, 0.11) | 0.08 |
| K305R/S306P/T307I/F318I/T320R/G321E      | 0.11 (0.09, 0.13) | 0.10 |
| 07J-W28 backbone                         |                   |      |
| CTRPGNNTRRPIRIGPGQTFIAREDIIGDIRQAYC†     | 0.39 (0.33, 0.45) | 0.38 |
| 305R→K                                   | 0.19 (0.14, 0.26) | 0.18 |
| 306P→S                                   | 0.35 (0.30, 0.40) | 0.33 |

Note: CI = Confidence intervals, FC = Fold change in IC50 compared to 07J-W0

\* Full-length 07J-W0 envelope; amino acid V3 sequence shown (starting at HXB2 position 296)

† Full-length envelope from 017-W28; amino acid V3 sequence shown
